# Supplementary material
Source: PubMed Central journal article supplement (PMC7478228)
Supplement: mmc1.pdf [file mmc1.pdf]

## Machine Learning and Prediction of All-Cause Mortality in COPD

*Matthew Moll, MD; Dandi Qiao, PhD; Elizabeth A. Regan, MD, PhD;  
Gary M. Hunninghake, MD, MPH; Barry J. Make, MD; Ruth Tal-Singer, PhD;  
Michael.J. McGeachie, PhD; Peter J. Castaldi, MD; Raul San Jose Estepar, PhD;  
George R. Washko, MD, MPH; James M. Wells, MD; David LaFon, MD;  
Matthew Strand, PhD; Russell P. Bowler, MD, PhD; MeiLan.K. Han, MD;  
Jorgen Vestbo, MD; Bartolome Celli, MD; Peter Calverley, MBChB, DSC; James Crapo, MD;  
Edwin K. Silverman, MD, PhD; Brian D. Hobbs, MD, MMSc; and Michael H. Cho, MD, MPH*

CHEST 2020; 158(3):952-964

*Online supplements are not copyedited prior to posting and the author(s) take full responsibility for the accuracy of all data.*

© 2020 AMERICAN COLLEGE OF CHEST PHYSICIANS. Reproduction of this article is prohibited without written permission from the American College of Chest Physicians. See online for more details. DOI: 10.1016/j.chest.2020.02.079

## **e-Appendix 1.**

### **eMethods**

#### **Study participants**

Details regarding the designs of COPDGene and ECLIPSE studies have been published previously.<sup>1,2</sup>

Briefly, the COPDGene study enrolled 10,192 current and ex-smokers from 21 U.S. clinical centers; participants were non-Hispanic Whites or African Americans, 45 to 80 years of age. The ECLIPSE study was a 3-year longitudinal study to identify surrogate endpoints of 2746 subjects (2164 COPD cases) associated with disease progression and exacerbations in COPD. Participants were 40-75 years of age at enrollment. In both studies, all COPD subjects had 10 or more pack-years of cigarette smoking. Mortality in the ECLIPSE study has been previously described and was a pre-specified end point in the longitudinal study.<sup>3</sup>

In COPDGene, death was determined by searching the social security death index (SSDI) database; a central search was performed on October 14, 2016, and deaths were back-censored three months to account for lag time between death and appearance in the SSDI database. Nine sites performed local SSDI searches at varying dates, and deaths were also back-censored three months. Vital statuses of an additional 333 participants for whom an SSDI search could not be performed were determined by the COPDGene longitudinal follow-up program (LFU).

#### **Study Design**

To develop a mortality prediction model, we first applied random forests, a machine learning method that has excellent overall performance in a diverse set of datasets, which provides feature selection and feature importance,<sup>4</sup> and has an implementation suitable for survival analysis.<sup>5</sup> We also performed Cox regression, pruning features selected from the random forest model for collinearity. We employed both models because these methods can complement each other.<sup>6</sup> Random forest variable importance measures can be used to identify predictors of an outcome, give insight into relative variable importance, or identify a small number of features that offer good prediction of an outcome.<sup>7</sup> Cox regression has arguably greater interpretability and proportional hazards analyses lend insight into the clinical impact of individual features. Our primary goal was to develop a model with high predictive accuracy and generalizability.

We trained the RSF model by generating twenty thousand individual trees (each with 4 splits and 17 randomly selected features considered at each split), and ranked features by variable importance. For parsimony, the top 95% of features were then used to develop an RSF model for time-to-death.

We made predictions over the entire follow up time for participants in the testing samples, which included 1) a testing sample of COPDGene subjects, 2) an external testing sample of ECLIPSE subjects with 8-year follow up data. For Cox models, we constructed a Schoenfeld residual plot for each feature to ensure there was no violation of the Cox proportional hazards assumption.

To understand the contribution of RSF to our results, we also compared a range of feature selection methods and prediction models. Univariate screens were performed with a Student t-test, including only variables with  $p$ -value  $< 0.05$ . Stepwise logistic regression was performed using the MASS R package <sup>8</sup>, and stepwise Cox regression was performed using the My.stepwise R package <sup>9</sup>. Lasso regression was performed using the glmnet R package <sup>10,11</sup>. We plotted calibration of models for predicting survival over 8 years using the pec R package <sup>12</sup>, and tested for miscalibration using the Greenwood-Nam-D'Agostino (GND) test as detailed by Demler et al. <sup>13</sup>.

For univariate associations with mortality, features were assessed for normality by visual inspection of histograms and Shapiro-Wilk tests. Results are shown as mean  $\pm$  sd or median [interquartile range], as appropriate. Differences in continuous variables were assessed with Student t-tests and analysis of variance (ANOVA), or non-parametric Wilcoxon and Kruskal-Wallis tests. Categorical variables were compared by ANOVA or Kruskal-Wallis tests.

The R Shiny app was created for researchers and clinicians to explore the relationship between predictors and mortality in our model. This tool accepts user-defined values for each feature and based on the Cox model built from COPDGene subjects, a survival function is calculated. The survival function is then used to calculate the probability of survival over time, and this is plotted as a Kaplan-Meier curve with confidence intervals (ggfortify R package).<sup>14</sup> Our web-based tool additionally includes the option of estimating probability of survival using a set of clinical features exclusive of quantitative imaging.

## **Imaging feature harmonization**

As imaging protocols differed between the COPDGene and ECLIPSE studies, we also performed a secondary analysis to determine whether harmonizing imaging features significantly changed our results. To assess the effects of imaging protocols, we matched COPDGene and ECLIPSE subjects based on FEV<sub>1</sub> (% predicted), FEV<sub>1</sub>/FVC, age, sex, pack-years, and current smoking status. %LAA  $< -950$  HU was log-transformed to allow for parametric testing. Visual display of imaging features in matched subjects can be found in Supplemental eFigure 1. To normalize imaging features for comparison between datasets, we transformed imaging data into z-scores. The means and standard deviations used for z-score calculation were derived from the matched subset of participants.

## **eResults**

The MLMP-COPD model (trained on 75% of COPDGene subjects) outperformed updated BODE and ADO in subgroups of ECLIPSE subjects, including GOLD spirometry grade 3 or 4, and severe or frequent exacerbator phenotypes (supplementary eTable 8). Characteristics of subgroups are shown in supplementary eTable 9.

## **A Case Study**

To illustrate how the MLMP-COPD could be used by clinicians and researchers, we present a hypothetical case of a COPD patient and examine her predicted survival using our online web application (available at

*Online supplements are not copyedited prior to posting and the author(s) take full responsibility for the accuracy of all data.*

<https://cdnm.shinyapps.io/cgmortalityapp/>). This application allows the user to change the input variables for either the full model or clinical variables alone – we will be using the full model.

Our patient is a 62 year-old woman with 25 pack-years of smoking, an FEV<sub>1</sub> of 40 % of predicted, who had 1 exacerbation in the last 12 months requiring hospitalization (exacerbation frequency = 1, Severe exacerbations = Yes). She walks slower on the level than her same-aged peers (MMRC = 2), and her resting SpO<sub>2</sub> is 90%. Her other measures are:

| Variable              | Hypothetical patient's value |
|-----------------------|------------------------------|
| 6MWD                  | 800 feet                     |
| FEV <sub>1</sub> /FVC | 45 %                         |
| FEF <sub>25-75</sub>  | 0.4 L                        |
| BMI                   | 24 kg/m <sup>2</sup>         |
| Diabetes mellitus     | No                           |
| PA:A ratio            | 0.9                          |
| Pi10                  | 3.7                          |
| % LAA < -950 HU       | 8 %                          |

Say, for example, we are interested in understanding how her predicted survival will change if she were to develop pulmonary vascular disease manifesting as an increased PA:A ratio. We simply input her clinical values into the online calculator and explore the change in predicted survival with changing PA:A ratio. Her baseline predicted survival over 8 years is 54.1% (supplementary eFigure 4A). If the patient were to develop worsening pulmonary vascular disease with a PA:A ratio increase from 0.9 to 1.2, her predicted survival would drop to 42.8% (supplementary eFigure 4B).

### **Competing Interests:**

M.H.C. and E.K.S. have received grant funding from GlaxoSmithKline (GSK). E.K.S. has received honoraria from Novartis for Continuing Medical Education Seminars and travel support from GSK. M.H.C. has received consulting fees from Genentech, AstraZeneca, and speaking fees from Illumina.

G.R.W. has received grant support from Boehringer Ingelheim, BTG Interventional Medicine, and other support from Genentech, Quantitative Imaging Solutions, PulmonX, Regeneron, ModoSpira, Janssen Pharmaceuticals, Toshiba, and GSK.

J.M.W. has received research contracts from Bayer, GlaxoSmithKline, Mereo BioPharma, AstraZeneca and Gilead and advisory/consultancy fees from GSK, Boehringer Ingelheim, AstraZeneca, Mereo BioPharma, Mylan and Quintiles.

R.T-S. is an employee of GSK.

M-L.K.H. reports consulting for GSK, BI, AZ, and research support from Sunovion and Novartis. Dr. R.S J E. reports personal fees from Toshiba, Boehringer Ingelheim he is also a founder and co-owner of Quantitative Imaging Solutions.

G.M.H. reports personal fees from Genentech, Boehringer Ingelheim and the Gerson Lehrman Group.

## **COPDGene Funding and Acknowledgements**

### **Grant Support and Disclaimer**

The project described was supported by Award Number U01 HL089897 and Award Number U01 HL089856 from the National Heart, Lung, and Blood Institute. The content is solely the responsibility of the authors and does not necessarily represent the official views of the National Heart, Lung, and Blood Institute or the National Institutes of Health.

### **COPD Foundation Funding**

The COPDGene® project is also supported by the COPD Foundation through contributions made to an Industry Advisory Board comprised of AstraZeneca, Boehringer Ingelheim, GlaxoSmithKline, Novartis, Pfizer, Siemens and Sunovion.

### **COPDGene® Investigators – Core Units**

*Administrative Center:* James D. Crapo, MD (PI); Edwin K. Silverman, MD, PhD (PI); Barry J. Make, MD; Elizabeth A. Regan, MD, PhD

*Genetic Analysis Center:* Terri Beaty, PhD; Ferdouse Begum, PhD; Peter J. Castaldi, MD, MSc; Michael Cho, MD; Dawn L. DeMeo, MD, MPH; Adel R. Boueiz, MD; Marilyn G. Foreman, MD, MS; Eitan Halper-Stromberg; Lystra P. Hayden, MD, MMSc; Craig P. Hersh, MD, MPH; Jacqueline Hetmanski, MS, MPH; Brian D. Hobbs, MD; John E. Hokanson, MPH, PhD; Nan Laird, PhD; Christoph Lange, PhD; Sharon M. Lutz, PhD; Merry-Lynn McDonald, PhD; Margaret M. Parker, PhD; Dandi Qiao, PhD; Elizabeth A. Regan, MD, PhD; Edwin K. Silverman, MD, PhD; Emily S. Wan, MD; Sungho Won, Ph.D.; Phuwant Sakornsakolpat, M.D.; Dmitry Prokopenko, Ph.D.

*Imaging Center:* Mustafa Al Qaisi, MD; Harvey O. Coxson, PhD; Teresa Gray; MeiLan K. Han, MD, MS; Eric A. Hoffman, PhD; Stephen Humphries, PhD; Francine L. Jacobson, MD, MPH; Philip F. Judy, PhD; Ella A. Kazerooni, MD; Alex Kluiber; David A. Lynch, MB; John D. Newell, Jr., MD; Elizabeth A. Regan, MD, PhD; James C. Ross, PhD; Raul San Jose Estepar, PhD; Joyce Schroeder, MD; Jered Sieren; Douglas Stinson; Berend C. Stoel, PhD; Juerg Tschirren, PhD; Edwin Van Beek, MD, PhD; Bram van Ginneken, PhD; Eva van Rikxoort, PhD; George Washko, MD; Carla G. Wilson, MS;

*PFT QA Center, Salt Lake City, UT:* Robert Jensen, PhD

*Data Coordinating Center and Biostatistics, National Jewish Health, Denver, CO:* Douglas Everett, PhD; Jim Crooks, PhD; Camille Moore, PhD; Matt Strand, PhD; Carla G. Wilson, MS

*Epidemiology Core, University of Colorado Anschutz Medical Campus, Aurora, CO:* John E. Hokanson, MPH, PhD; John Hughes, PhD; Gregory Kinney, MPH, PhD; Sharon M. Lutz, PhD; Katherine Pratte, MSPH; Kendra A. Young, PhD

*Mortality Adjudication Core:* Surya Bhatt, MD; Jessica Bon, MD; MeiLan K. Han, MD, MS; Barry Make, MD; Carlos Martinez, MD, MS; Susan Murray, ScD; Elizabeth Regan, MD; Xavier Soler, MD; Carla G. Wilson, MS

*Biomarker Core:* Russell P. Bowler, MD, PhD; Katerina Kechris, PhD; Farnoush Banaei-Kashani, Ph.D

### **COPDGene® Investigators – Clinical Centers**

*Ann Arbor VA:* Jeffrey L. Curtis, MD; Carlos H. Martinez, MD, MPH; Perry G. Pernicano, MD

*Baylor College of Medicine, Houston, TX:* Nicola Hanania, MD, MS; Philip Alapat, MD; Mustafa Atik, MD; Venkata Bandi, MD; Aladin Boriek, PhD; Kalpatha Guntupalli, MD; Elizabeth Guy, MD; Arun Nachiappan, MD; Amit Parulekar, MD;

*Brigham and Women's Hospital, Boston, MA:* Dawn L. DeMeo, MD, MPH; Craig Hersh, MD, MPH; Francine L. Jacobson, MD, MPH; George Washko, MD

*Columbia University, New York, NY:* R. Graham Barr, MD, DrPH; John Austin, MD; Belinda D'Souza, MD; Gregory D.N. Pearson, MD; Anna Rozenshtein, MD, MPH, FACR; Byron Thomashow, MD

*Duke University Medical Center, Durham, NC:* Neil MacIntyre, Jr., MD; H. Page McAdams, MD; Lacey Washington, MD

*HealthPartners Research Institute, Minneapolis, MN:* Charlene McEvoy, MD, MPH; Joseph Tashjian, MD

*Johns Hopkins University, Baltimore, MD:* Robert Wise, MD; Robert Brown, MD; Nadia N. Hansel, MD, MPH; Karen Horton, MD; Allison Lambert, MD, MHS; Nirupama Putcha, MD, MHS

*Los Angeles Biomedical Research Institute at Harbor UCLA Medical Center, Torrance, CA:* Richard Casaburi, PhD, MD; Alessandra Adami, PhD; Matthew Budoff, MD; Hans Fischer, MD; Janos Porszasz, MD, PhD; Harry Rossiter, PhD; William Stringer, MD

*Michael E. DeBakey VAMC, Houston, TX:* Amir Sharafkhaneh, MD, PhD; Charlie Lan, DO

*Minneapolis VA:* Christine Wendt, MD; Brian Bell, MD

*Morehouse School of Medicine, Atlanta, GA:* Marilyn G. Foreman, MD, MS; Eugene Berkowitz, MD, PhD; Gloria Westney, MD, MS

*National Jewish Health, Denver, CO:* Russell Bowler, MD, PhD; David A. Lynch, MB

*Reliant Medical Group, Worcester, MA:* Richard Rosiello, MD; David Pace, MD

*Temple University, Philadelphia, PA:* Gerard Criner, MD; David Ciccolella, MD; Francis Cordova, MD; Chandra Dass, MD; Gilbert D'Alonzo, DO; Parag Desai, MD; Michael Jacobs, PharmD; Steven Kelsen, MD, PhD; Victor Kim, MD; A. James Mamary, MD; Nathaniel Marchetti, DO; Aditi Satti, MD; Kartik Shenoy, MD; Robert M. Steiner, MD; Alex Swift, MD; Irene Swift, MD; Maria Elena Vega-Sanchez, MD

*University of Alabama, Birmingham, AL:* Mark Dransfield, MD; William Bailey, MD; Surya Bhatt, MD; Anand Iyer, MD; Hrudaya Nath, MD; J. Michael Wells, MD

*University of California, San Diego, CA:* Joe Ramsdell, MD; Paul Friedman, MD; Xavier Soler, MD, PhD; Andrew Yen, MD

*University of Iowa, Iowa City, IA:* Alejandro P. Comellas, MD; Karin F. Hoth, PhD; John Newell, Jr., MD; Brad Thompson, MD

*University of Michigan, Ann Arbor, MI:* MeiLan K. Han, MD, MS; Ella Kazerooni, MD; Carlos H. Martinez, MD, MPH

*University of Minnesota, Minneapolis, MN:* Joanne Billings, MD; Abbie Begnaud, MD; Tadashi Allen, MD

*University of Pittsburgh, Pittsburgh, PA:* Frank Scieurba, MD; Jessica Bon, MD; Divay Chandra, MD, MSc; Carl Fuhrman, MD; Joel Weissfeld, MD, MPH

*University of Texas Health Science Center at San Antonio, San Antonio, TX:* Antonio Anzueto, MD; Sandra Adams, MD; Diego Maselli-Caceres, MD; Mario E. Ruiz, MD

The **ECLIPSE** study (NCT00292552; GSK code SCO104960) was funded by GlaxoSmithKline.

**ECLIPSE Investigators** — *Bulgaria:* Y. Ivanov, Pleven; K. Kostov, Sofia. *Canada:* J. Bourbeau, Montreal; M. Fitzgerald, Vancouver, BC; P. Hernandez, Halifax, NS; K. Killian, Hamilton, ON; R. Levy, Vancouver, BC; F. Maltais, Montreal; D. O'Donnell, Kingston, ON. *Czech Republic:* J. Krepelka, Prague. *Denmark:* J. Vestbo, Hvidovre. *The Netherlands:* E. Wouters, Horn-Maastricht. *New Zealand:* D. Quinn, Wellington. *Norway:* P. Bakke, Bergen. *Slovenia:* M. Kosnik, Golnik. *Spain:* A. Agusti, J. Sauleda, P. de Mallorca. *Ukraine:* Y. Feschenko, V. Gavrisyuk, L. Yashina, Kiev; N. Monogarova, Donetsk. *United Kingdom:* P. Calverley, Liverpool; D. Lomas, Cambridge; W. MacNee, Edinburgh; D. Singh, Manchester; J. Wedzicha, London. *United States:* A. Anzueto, San Antonio, TX; S. Braman, Providence, RI; R. Casaburi, Torrance CA; B. Celli, Boston; G. Giessel, Richmond, VA; M. Gotfried, Phoenix, AZ; G. Greenwald, Rancho Mirage, CA; N. Hanania, Houston; D. Mahler, Lebanon, NH; B. Make, Denver; S. Rennard, Omaha, NE; C. Rochester, New Haven, CT; P. Scanlon, Rochester, MN; D. Schuller, Omaha, NE; F. Scieurba, Pittsburgh; A. Sharafkhaneh, Houston; T. Siler, St. Charles, MO; E. Silverman, Boston; A. Wanner, Miami; R. Wise, Baltimore; R. ZuWallack, Hartford, CT.



# CHEST<sup>™</sup> Online Supplement

**ECLIPSE Steering Committee:** H. Coxson (Canada), C. Crim (GlaxoSmithKline, USA), L. Edwards (GlaxoSmithKline, USA), D. Lomas (UK), W. MacNee (UK), E. Silverman (USA), R. Tal Singer (Co-chair, GlaxoSmithKline, USA), J. Vestbo (Co-chair, Denmark), J. Yates (GlaxoSmithKline, USA).

**ECLIPSE Scientific Committee:** A. Agusti (Spain), P. Calverley (UK), B. Celli (USA), C. Crim (GlaxoSmithKline, USA), B. Miller (GlaxoSmithKline, USA), W. MacNee (Chair, UK), S. Rennard (USA), R. Tal-Singer (GlaxoSmithKline, USA), E. Wouters (The Netherlands), J. Yates (GlaxoSmithKline, USA).



**e-Figure 1:** Comparison of quantitative imaging features in COPDGene and ECLIPSE. Boxplots are shown describing imaging features which included %LAA < -950 HU, Pi10, perc15, and % WA. Two-sample t-tests confirmed that the data were significantly different, despite matching.

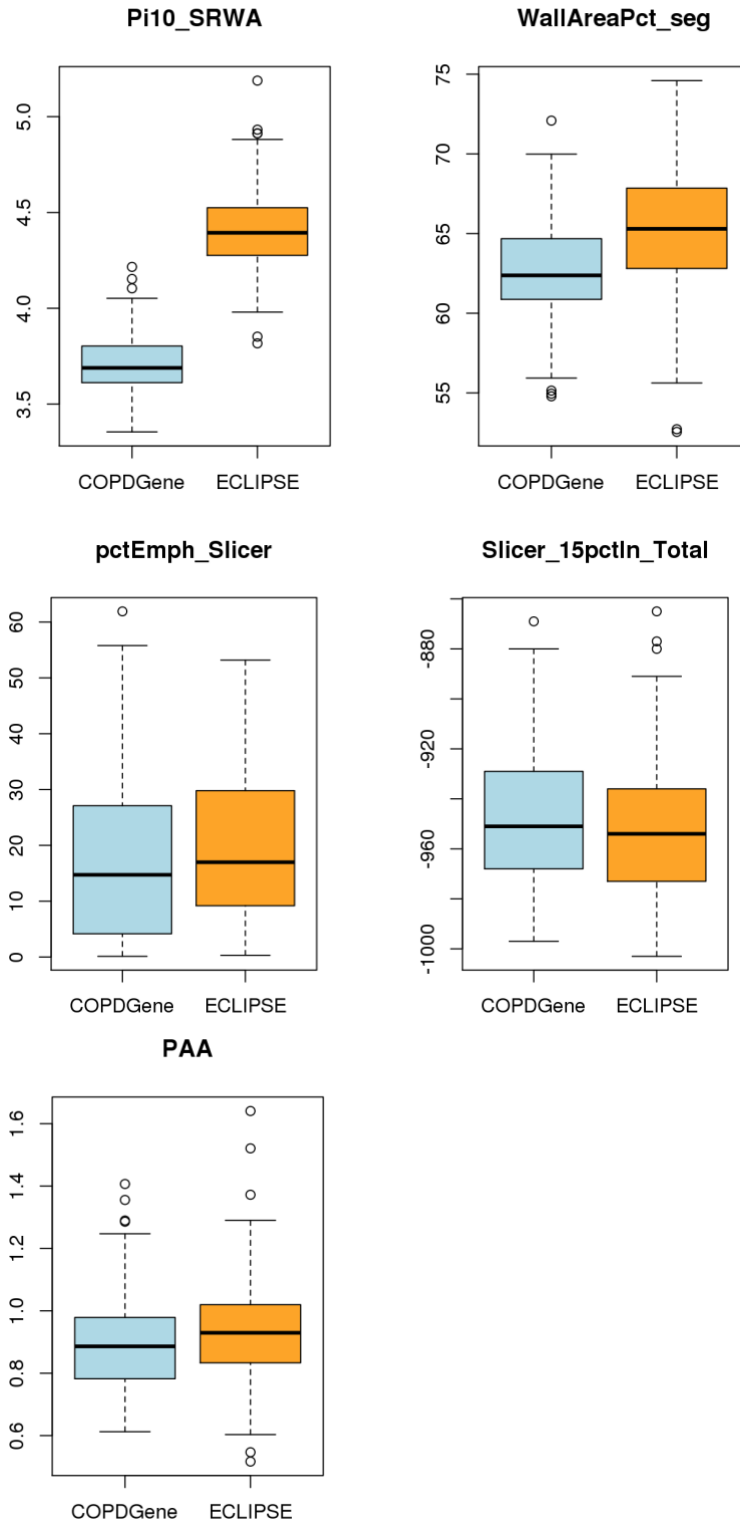

**e-Figure 2A:** Receiver operator characteristic (ROC) curve comparing the RSF-derived mortality prediction models to BODE and e-BODE tested within COPDGene. Models were trained and tested within the COPDGene sample.

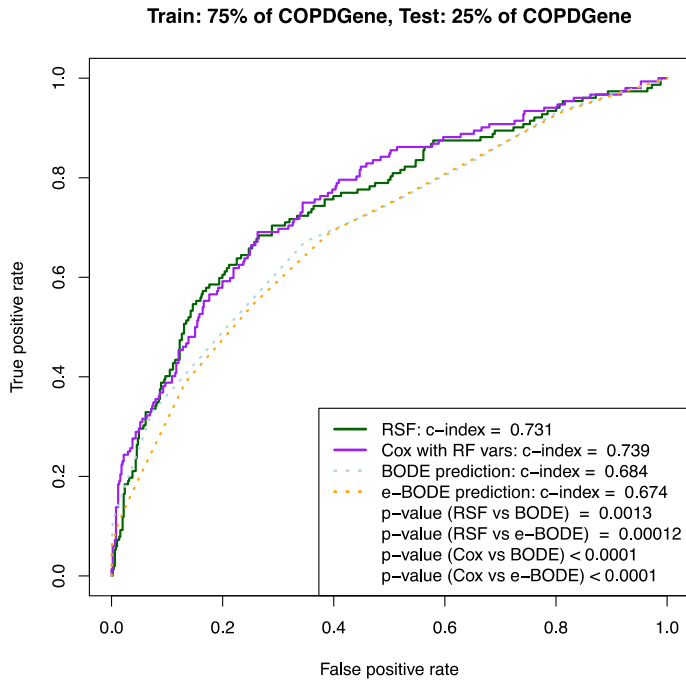

**e-Figure 2B:** Receiver operator characteristic (ROC) curve comparing the RSF-derived mortality prediction models to BODE and e-BODE tested on ECLIPSE. Models were trained in COPDGene and tested in ECLIPSE subjects.

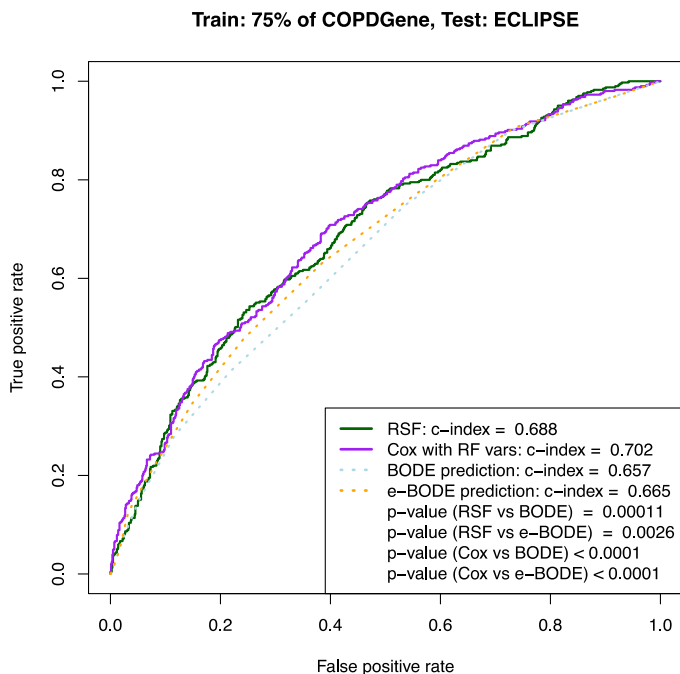

**e-Figure 3A:** ROC curve for MLMP-COPD model after data transformation using updated BODE and ADO for comparison. Both COPDGene and ECLIPSE dataset imaging features were transformed into Z-scores. RSF model was re-trained on the training set of COPDGene, and tested on both the testing sample of COPDGene and ECLIPSE. This figure shows the comparison of the performance of the RSF model and the Cox model with RSF-selected features to updated BODE and ADO.

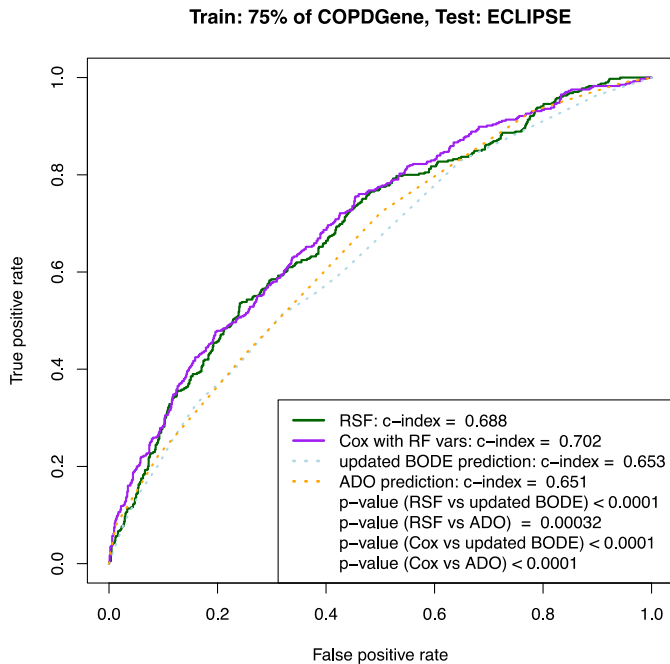

**e-Figure 3B:** ROC curve for MLMP-COPD model after data transformation using BODE and e-BODE for comparison. Both COPDGene and ECLIPSE dataset imaging features were transformed into Z-scores. RSF model was re-trained on the training set of COPDGene, and tested on both the testing sample of COPDGene and ECLIPSE. This figure shows the comparison of the performance of the RSF model and the Cox model with RSF-selected features to BODE and e-BODE.

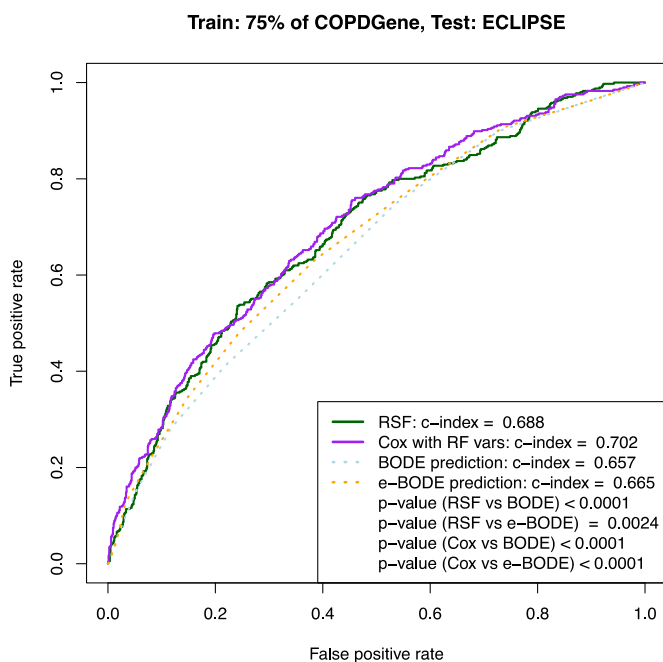

**e-Figure 4:** Calibration curves for BODE (*black*) and MLMP-COPD (*red*) models for predicting mortality over 8 years in A) the testing set of COPDGene, and B) ECLIPSE. The identity line (*gray*) represents an ideal, perfectly calibrated, model.

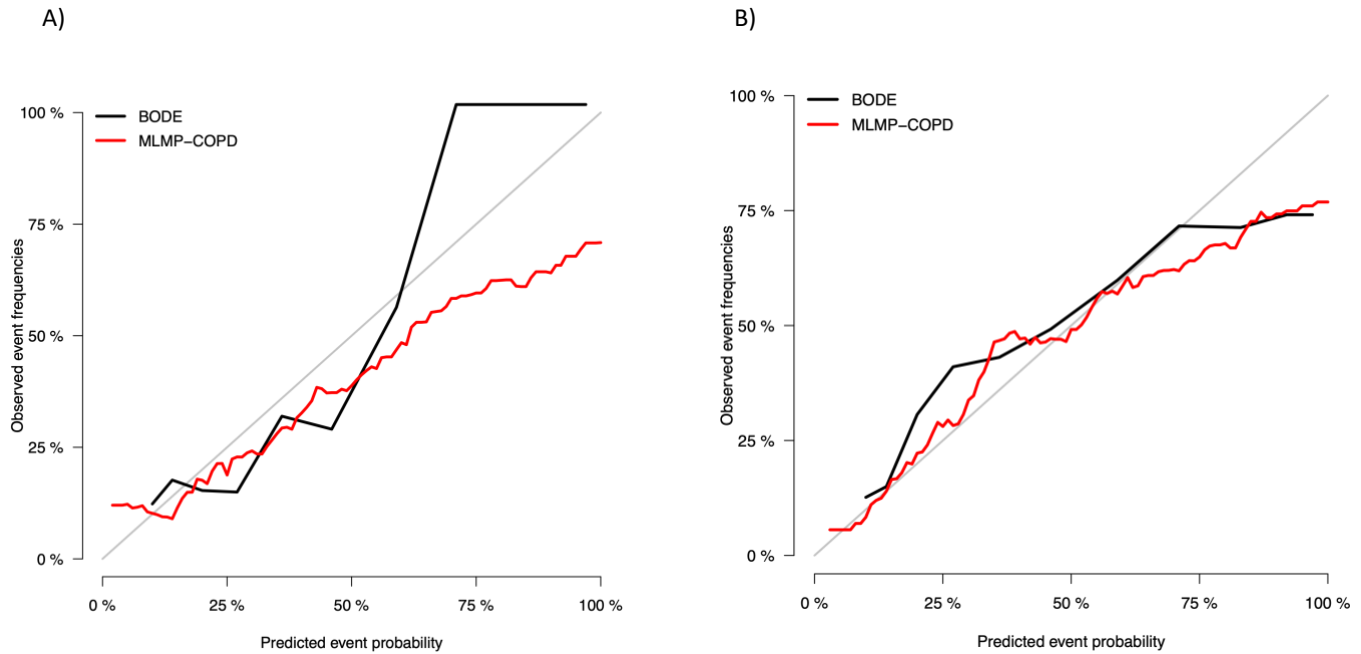

**e-Figure 5A:** COPDGene Mortality Risk Calculator (available at <https://cdnm.shinyapps.io/cgmortalityapp/>) outputs based on a hypothetical patient. The patient is a 62 year-old woman with 25 pack-years of smoking, an FEV<sub>1</sub> of 40 % of predicted, who had 1 exacerbation in the last 12 months requiring hospitalization. She walks slower on the level than her same-aged peers (MMRC = 2), and her resting SpO<sub>2</sub> is 90%. See eResults section for other measures. Below shows the baseline predicted survival based on this patient's data.

Based on these variables, the probability of survival at 8 years is:

54.1%

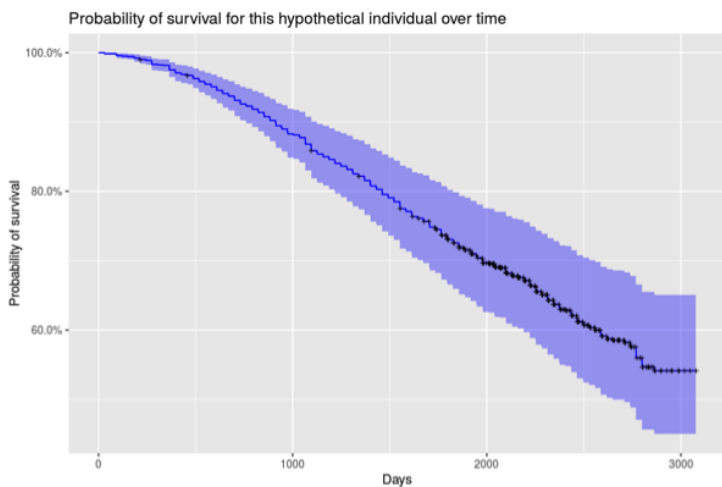

**e-Figure 5B:** COPDGene Mortality Risk Calculator (available at <https://cdnm.shinyapps.io/cgmortalityapp/>) outputs based on a hypothetical patient. The patient is a 62 year-old woman with 25 pack-years of smoking, an FEV<sub>1</sub> of 40 % of predicted, who had 1 exacerbation in the last 12 months requiring hospitalization. She walks slower on the level than her same-aged peers (MMRC = 2), and her resting SpO<sub>2</sub> is 90%. See eResults section for other measures. Below shows the Predicted survival after changing PA:A ratio from 0.9 to 1.2, holding all other variables constant.

Based on these variables, the probability of survival at 8 years is:

42.8%

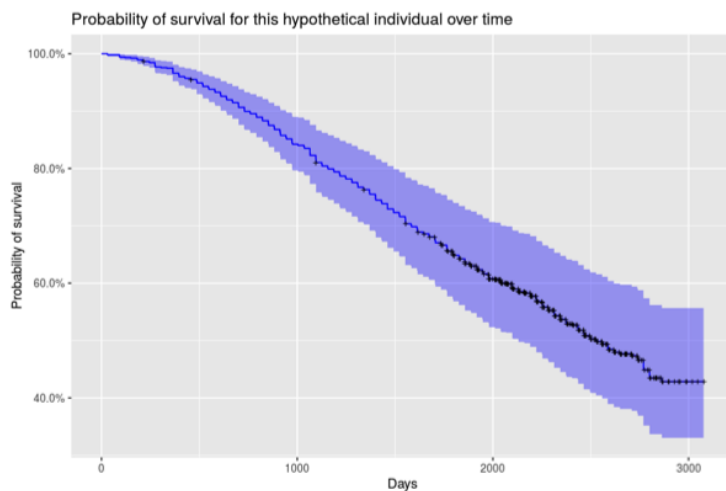

**e-Table 1:**

Characteristics of study participants. Full demographics of the COPDGene training and testing datasets, and ECLIPSE subjects included in the analysis:

|                                                        | <i>COPDGene Training Set</i> | <i>COPDGene Testing Set</i> | <i>ECLIPSE</i>       | <i>p-value</i> |
|--------------------------------------------------------|------------------------------|-----------------------------|----------------------|----------------|
| n                                                      | 1974                         | 658                         | 1268                 |                |
| Sex (No. female, (%))                                  | 856 (43.4)                   | 301 (45.7)                  | 426 (33.6)           | <0.001         |
| Age in years (mean (sd))                               | 63.54 (8.92)                 | 63.69 (8.91)                | 63.51 (7.03)         | 0.890          |
| Race (No. African American (%))                        | 377 (19.1)                   | 108 (16.4)                  | 0 (0.0)              | <0.001         |
| FEV1 % predicted (median [IQR])                        | 52.45 [37.20, 66.60]         | 50.50 [34.90, 66.00]        | 45.95 [35.00, 58.73] | <0.001         |
| FVC % predicted (mean (sd))                            | 77.35 (16.68)                | 76.62 (17.02)               | 79.16 (19.82)        | 0.003          |
| FEV1/FVC ratio (median [IQR])                          | 0.51 [0.39, 0.62]            | 0.49 [0.38, 0.60]           | 0.43 [0.35, 0.52]    | <0.001         |
| FEF25-75 in Liters (median [IQR])                      | 0.49 [0.30, 0.80]            | 0.46 [0.29, 0.73]           | 0.40 [0.28, 0.57]    | <0.001         |
| Percent change in FEV1 post-bronchodilator (mean (sd)) | 8.62 (12.48)                 | 9.84 (13.77)                | 11.35 (14.24)        | <0.001         |
| Percent change in FVC post-bronchodilator (mean (sd))  | 8.03 (14.46)                 | 10.06 (21.83)               | 10.32 (14.75)        | <0.001         |
| GOLD Spirometry Grade (No. (%))                        |                              |                             |                      | <0.001         |
| 2                                                      | 1072 (54.3)                  | 335 (50.9)                  | 518 (40.9)           |                |
| 3                                                      | 616 (31.2)                   | 203 (30.9)                  | 568 (44.8)           |                |
| 4                                                      | 286 (14.5)                   | 120 (18.2)                  | 182 (14.4)           |                |
| Pack-years cigarette smoking (median [IQR])            | 47.60 [35.40, 67.50]         | 47.25 [36.85, 70.00]        | 45.00 [32.00, 60.00] | <0.001         |
| Current Smoking (No. (%))                              | 799 (40.5)                   | 242 (36.8)                  | 431 (34.0)           | 0.001          |
| Dead at 3 years (No. (%))                              | 164 (8.3)                    | 57 (8.7)                    | 121 (9.5)            | 0.477          |
| Dead at 5 years (No. (%))                              | 345 (17.5)                   | 109 (16.6)                  | 0 (NaN)              | NaN            |
| Dead at 8 years (No. (%))                              | 479 (24.3)                   | 152 (23.1)                  | 0 (NaN)              | NaN            |

|                                                |                                  |                                  |                                  |        |
|------------------------------------------------|----------------------------------|----------------------------------|----------------------------------|--------|
| Total Dead (No. (%))                           | 479 (24.3)                       | 152 (23.1)                       | 405 (31.9)                       | <0.001 |
| Days Followed (median [IQR])                   | 2318.00<br>[2043.00,<br>2624.00] | 2377.00<br>[2071.00,<br>2683.00] | 2616.00<br>[1110.00,<br>2924.00] | <0.001 |
| 6-minute walk distance (ft)<br>(mean (sd))     | 1208.06 (390.54)                 | 1199.70 (397.70)                 | 1190.36 (389.77)                 | 0.453  |
| BODE (median [IQR])                            | 3.00 [1.00, 4.00]                | 3.00 [1.00, 5.00]                | 3.00 [2.00, 5.00]                | <0.001 |
| eBODE (median [IQR])                           | 3.00 [1.00, 5.00]                | 3.00 [1.00, 5.00]                | 3.00 [2.00, 5.00]                | <0.001 |
| updated BODE (median [IQR])                    | 3.00 [1.00, 7.00]                | 3.00 [1.00, 8.00]                | 3.00 [1.00, 7.00]                | 0.990  |
| ADO (mean (sd))                                | 4.58 (1.78)                      | 4.67 (1.85)                      | 3.84 (1.44)                      | <0.001 |
| MMRC Dyspnea Score (No. (%))                   |                                  |                                  |                                  | <0.001 |
| 0                                              | 425 (21.5)                       | 137 (20.8)                       | 141 (11.1)                       |        |
| 1                                              | 275 (13.9)                       | 92 (14.0)                        | 424 (33.4)                       |        |
| 2                                              | 358 (18.1)                       | 123 (18.7)                       | 432 (34.1)                       |        |
| 3                                              | 584 (29.6)                       | 175 (26.6)                       | 210 (16.6)                       |        |
| 4                                              | 332 (16.8)                       | 131 (19.9)                       | 61 (4.8)                         |        |
| BMI (kg/m <sup>2</sup> ) (mean (sd))           | 28.05 (6.16)                     | 28.07 (5.96)                     | 26.61 (5.48)                     | <0.001 |
| Resting SaO <sub>2</sub> (median [IQR])        | 95.00 [94.00,<br>97.00]          | 95.00 [93.00,<br>97.00]          | 95.00 [93.00,<br>96.00]          | <0.001 |
| Severe Exacerbations (No. (%))                 | 394 (20.0)                       | 156 (23.7)                       | 271 (21.4)                       | 0.117  |
| Exacerbation Frequency (No./yr)<br>(mean (sd)) | 0.70 (1.19)                      | 0.82 (1.33)                      | 0.78 (1.00)                      | 0.027  |
| PA:A Ratio (mean (sd))                         | 0.89 (0.14)                      | 0.90 (0.14)                      | 0.93 (0.15)                      | <0.001 |
| Pi10 (mean (sd))                               | 3.72 (0.14)                      | 3.72 (0.13)                      | 4.41 (0.20)                      | <0.001 |
| % WA (mean (sd))                               | 62.73 (2.89)                     | 62.83 (2.95)                     | 65.62 (4.06)                     | <0.001 |
| % LAA < -950 HU (median<br>[IQR])              | 8.17 [2.56,<br>19.91]            | 10.05 [2.69,<br>21.74]           | 16.66 [8.92,<br>27.36]           | <0.001 |
| Perc 15 (mean (sd))                            | -938.05 (28.46)                  | -941.08 (27.89)                  | -956.78 (49.72)                  | <0.001 |
| ILA (No. (%))                                  | 122 (6.2)                        | 34 (5.2)                         | 120 (9.5)                        | <0.001 |
| Subpleural ILA (No. (%))                       | 90 (4.6)                         | 24 (3.6)                         | 105 (8.3)                        | <0.001 |

The logo for CHEST Online Supplement features a stylized icon of three curved lines in blue and orange on the left, followed by the word "CHEST" in a large, bold, black sans-serif font with a trademark symbol. To the right of "CHEST", the words "Online Supplement" are written in a smaller, blue sans-serif font.

|                              |             |            |            |        |
|------------------------------|-------------|------------|------------|--------|
| Fibrotic ILA (No. (%))       | 24 (1.2)    | 4 (0.6)    | 23 (1.8)   | 0.076  |
| Stroke (No. (%))             | 65 (3.3)    | 21 (3.2)   | 43 (3.4)   | 0.972  |
| Hypertension (No. (%))       | 1003 (50.8) | 333 (50.6) | 485 (38.2) | <0.001 |
| Diabetes (No. (%))           | 239 (12.1)  | 71 (10.8)  | 124 (9.8)  | 0.115  |
| Chronic Bronchitis (No. (%)) | 552 (28.0)  | 183 (27.8) | 436 (34.4) | <0.001 |



**e-Table 2:** The initial 30 features used as inputs into the RSF algorithm. Features included demographic and clinical, spirometric, radiographic, and cardiovascular features.

| Demographic and clinical features | Spirometric features                       | Radiographic features | Cardiovascular comorbidities |
|-----------------------------------|--------------------------------------------|-----------------------|------------------------------|
| Sex                               | FEV1 % predicted                           | PA:A Ratio            | Stroke                       |
| Age                               | FVC % predicted                            | Pi10                  | Hypertension                 |
| Race                              | FEV1/FVC ratio                             | % WA                  | Diabetes                     |
| Pack-years cigarette smoking      | FEF25-75 in Liters                         | % LAA < -950 HU       |                              |
| Current Smoking                   | Percent change in FEV1 post-bronchodilator | Perc 15               |                              |
| 6-minute walk distance            | Percent change in FVC post-bronchodilator  | ILA                   |                              |
| MMRC Dyspnea Score                | GOLD Spirometry Grade                      | Subpleural ILA        |                              |
| BMI                               |                                            | Fibrotic ILA          |                              |
| Resting SaO2                      |                                            |                       |                              |
| Severe Exacerbations              |                                            |                       |                              |
| Exacerbation Frequency            |                                            |                       |                              |
| Chronic Bronchitis                |                                            |                       |                              |

**e-Table 3:** Cox regression coefficients for RSF-selected features included in the final MLMP-COPD model.

| <i>Feature</i>                  | <i>Coefficient</i> |
|---------------------------------|--------------------|
| 6-minute walk distance (ft)     | -0.00106           |
| FEV1 % predicted                | -0.0146            |
| Age in years                    | 0.0414             |
| MMRC Dyspnea Score (No. (%))    | 0.138              |
| FEV1/FVC ratio                  | -2.32              |
| FEF25-75 in Liters              | 0.555              |
| Resting SaO2                    | -0.0292            |
| Exacerbation Frequency (No./yr) | 0.0324             |
| Pack-years cigarette smoking    | 0.00518            |
| BMI (kg/m <sup>2</sup> )        | -0.03              |
| Severe Exacerbations (No. (%))  | 0.282              |
| PA:A Ratio                      | 1.01               |
| Pi10                            | 0.484              |
| Diabetes (No. (%))              | 0.279              |
| % LAA < -950 HU                 | -0.00543           |

**e-Table 4:** Clinical interpretations of hazard ratios for the fully-adjusted Cox (MLMP-COPD) model. Interpretations are only provided for features that were significantly associated with mortality in the final model. Relevant changes in each feature are shown, with associated changes in predicted hazard (rate) of death, assuming all covariates are held constant. Note that the probabilities of survival will depend on the individual patient’s baseline survival function, and be non-linear in relation to the reported changes in hazard rates.

| <i>Feature</i>                 | <i>Change</i>                                   | <i>Increase in hazard (rate) of death</i> |
|--------------------------------|-------------------------------------------------|-------------------------------------------|
| 6-minute walk distance (ft)    | Decrease 100 feet                               | 11%                                       |
| FEV1 % predicted               | Decrease 10%                                    | 16%                                       |
| Age in years                   | Increase 5 years                                | 22%                                       |
| MMRC Dyspnea Score (No. (%))   | Increase 1 category                             | 15%                                       |
| FEV1/FVC ratio                 | Decrease by 0.1                                 | 26%                                       |
| FEF25-75 in Liters             | Increase by 100 mL                              | 5.7%                                      |
| Resting SaO2                   | Decrease by 1%                                  | 3%                                        |
| Pack-years cigarette smoking   | Increase by 10 pack years                       | 10%                                       |
| BMI (kg/m <sup>2</sup> )       | Decrease by 1 mg/kg <sup>2</sup>                | 3.1%                                      |
| Severe Exacerbations (No. (%)) | Having 1 exacerbation requiring hospitalization | 33%                                       |
| PA:A Ratio                     | Increase by 0.1                                 | 11%                                       |
| Diabetes (No. (%))             | Presence of Diabetes                            | 32%                                       |

**e-Table 5:** Evaluation of model calibrations in the COPDGene training, COPDGene testing, and ECLIPSE datasets. P-values for the Greenwood-Nam-D’Agostino (GND) test <sup>13</sup> are shown in the table. A p-value < 0.05 indicates significant miscalibration of the model.

| <i>Model</i> | <i>COPDGene training set (n=1974, 479 deaths (24%))</i> | <i>COPDGene testing set (n=658, 152 deaths (23%))</i> | <i>ECLIPSE (n=1268, 405 deaths (32%))</i> |
|--------------|---------------------------------------------------------|-------------------------------------------------------|-------------------------------------------|
| BODE         | 0.65                                                    | 0.0023                                                | 7.50E-06                                  |
| MLMP-COPD    | 0.42                                                    | 0.056                                                 | 0.09                                      |

**e-Table 6:** Cox regression coefficients for the clinical model without imaging features.

| <i>Feature</i>                  | <i>Coefficient</i> |
|---------------------------------|--------------------|
| 6-minute walk distance (ft)     | -0.00109           |
| FEV1pp                          | -0.0149            |
| Age in years                    | 0.0391             |
| MMRC Dyspnea Score (No. (%))    | 0.13               |
| FEV1/FVC ratio                  | -1.71              |
| FEF25-75 in Liters              | 0.413              |
| Resting SaO2                    | -0.0367            |
| Exacerbation Frequency (No./yr) | 0.0281             |
| Pack-years cigarette smoking    | 0.00496            |
| BMI (kg/m <sup>2</sup> )        | -0.0246            |
| Severe Exacerbations (No. (%))  | 0.387              |
| Diabetes (No. (%))              | 0.31               |

**e-Table 7:** Evaluation of impact of individual CT imaging features on predictive performance. Cox regression models adding individual quantitative imaging features compared to updated BODE and ADO. Models were trained in COPDGene and tested in ECLIPSE participants.

| <i>Model (BODE + )</i> | <i>Model C-index</i> | <i>Updated BODE C-index</i> | <i>p-value</i> | <i>ADO C-index</i> | <i>p-value</i> |
|------------------------|----------------------|-----------------------------|----------------|--------------------|----------------|
| % LAA < -950 HU        | 0.659                | 0.653                       | 0.4            | 0.651              | 0.5            |
| Perc15                 | 0.653                | 0.653                       | 0.99           | 0.651              | 0.9            |
| Pi10                   | 0.653                | 0.653                       | 0.98           | 0.651              | 0.9            |
| WAP                    | 0.661                | 0.653                       | 0.2            | 0.651              | 0.3            |
| PA:A ratio             | 0.663                | 0.653                       | 0.2            | 0.651              | 0.3            |

**e-Table 8:** Predictive performance (C-indices) of combinations of features selection methods paired with prediction models. All models were compared to BODE, which had a C-index of 0.68 in the COPDGene testing set and 0.66 in the ECLIPSE dataset.

| Variable selection method | Number of features selected | Prediction model       | COPDGene (set-aside test data) |                    | ECLIPSE (external validation) |                    |
|---------------------------|-----------------------------|------------------------|--------------------------------|--------------------|-------------------------------|--------------------|
|                           |                             |                        | C index                        | p-value (vs. BODE) | C index                       | p-value (vs. BODE) |
| Univariate screen         | 30                          | Cox                    | 0.74                           | 0.001              | 0.68                          | 0.02               |
| Stepwise logistic         | 20                          | Logistic               | 0.74                           | 0.007              | 0.68                          | 0.04               |
| Stepwise Cox              | 19                          | Cox                    | 0.73                           | 0.01               | 0.68                          | 0.05               |
| Lasso                     | 27                          | Cox                    | 0.75                           | 0.0006             | 0.69                          | 0.007              |
| Random survival forest    | 15                          | Random survival forest | 0.73                           | 0.001              | 0.69                          | 0.00011            |
| Random survival forest    | 15                          | Cox                    | 0.74                           | < 0.0001           | 0.70                          | < 0.0001           |

**e-Table 9:** Subgroup analyses C-indices. The MLMP-COPD model was tested on subgroups of ECLIPSE, and c-indices are compared to updated BODE and ADO.

| Subgroup              | Cox model | Updated BODE | p-value (updated BODE) | ADO   | p-value (ADO) |
|-----------------------|-----------|--------------|------------------------|-------|---------------|
| GOLD 2                | 0.699     | 0.659        | 0.05612                | 0.669 | 0.0561        |
| GOLD 3                | 0.687     | 0.618        | < 0.0001               | 0.616 | < 0.0001      |
| GOLD 4                | 0.638     | 0.554        | 0.0013655              | 0.554 | 0.00137       |
| Frequent Exacerbators | 0.71      | 0.655        | 0.0051689              | 0.634 | 0.00517       |
| Severe Exacerbators   | 0.638     | 0.604        | 0.065322               | 0.59  | 0.0653        |

**e-Table 10:** Characteristics of ECLIPSE subgroups. MLMP-COPD performance was tested in subgroups of ECLIPSE participants, including GOLD spirometry grades 2-4, severe and frequent exacerbator phenotypes.

| <i>Variable</i>                                        | <i>GOLD 2</i>    | <i>GOLD 3</i>    | <i>GOLD 4</i>    | <i>Severe Exacerbators</i> | <i>Frequent Exacerbators</i> |
|--------------------------------------------------------|------------------|------------------|------------------|----------------------------|------------------------------|
| n                                                      | 518              | 568              | 182              | 271                        | 310                          |
| Sex (No. female, (%))                                  | 195 (37.6)       | 181 (31.9)       | 50 (27.5)        | 101 (37.3)                 | 103 (33.2)                   |
| Age in years (mean (sd))                               | 63.98 (7.18)     | 63.46 (6.91)     | 62.31 (6.83)     | 63.82 (7.05)               | 63.97 (7.03)                 |
| Race (No. Caucasian (%))                               | 518 (100.0)      | 568 (100.0)      | 182 (100.0)      | 271 (100.0)                | 310 (100.0)                  |
| FEV1% predicted (mean (sd))                            | 62.68 (8.33)     | 40.17 (5.79)     | 24.94 (3.42)     | 40.20 (13.94)              | 44.98 (15.53)                |
| FVC % predicted (mean (sd))                            | 90.77 (16.96)    | 75.10 (16.61)    | 58.76 (14.44)    | 74.25 (19.45)              | 78.13 (19.54)                |
| FEV1/FVC ratio (mean (sd))                             | 0.52 (0.08)      | 0.40 (0.09)      | 0.32 (0.07)      | 0.40 (0.10)                | 0.42 (0.11)                  |
| FEF25-75 in Liters (mean (sd))                         | 0.65 (0.26)      | 0.37 (0.14)      | 0.24 (0.07)      | 0.36 (0.18)                | 0.43 (0.22)                  |
| Percent change in FEV1 post-bronchodilator (mean (sd)) | 12.05 (13.88)    | 11.55 (14.75)    | 8.77 (13.39)     | 11.61 (14.47)              | 11.84 (14.61)                |
| Percent change in FVC post-bronchodilator (mean (sd))  | 8.81 (12.24)     | 10.74 (15.46)    | 13.35 (18.18)    | 11.08 (13.43)              | 10.03 (14.46)                |
| Pack-years cigarette smoking (mean (sd))               | 48.74 (28.16)    | 49.59 (24.11)    | 50.91 (28.73)    | 47.21 (23.19)              | 48.49 (25.06)                |
| Current Smoking (No. (%))                              | 160 (30.9)       | 214 (37.7)       | 57 (31.3)        | 84 (31.0)                  | 95 (30.6)                    |
| Total Dead (No. (%))                                   | 122 (23.6)       | 197 (34.7)       | 86 (47.3)        | 141 (52.0)                 | 112 (36.1)                   |
| Days Followed (mean (sd))                              | 2286.42 (866.98) | 2072.00 (892.26) | 1793.45 (894.03) | 1907.58 (866.34)           | 2060.05 (867.92)             |
| 6-minute walk distance (ft) (mean (sd))                | 1302.83 (354.62) | 1162.97 (390.91) | 955.75 (362.82)  | 1059.29 (370.95)           | 1179.53 (360.90)             |
| BODE (mean (sd))                                       | 1.70 (1.43)      | 3.98 (1.65)      | 5.66 (1.45)      | 4.50 (2.09)                | 3.57 (2.06)                  |
| MMRC Dyspnea Score (No. (%))                           |                  |                  |                  |                            |                              |
| 0                                                      | 92 (17.8)        | 46 (8.1)         | 3 (1.6)          | 12 (4.4)                   | 29 (9.4)                     |

|                                             |                 |                 |                 |                 |                 |
|---------------------------------------------|-----------------|-----------------|-----------------|-----------------|-----------------|
| 1                                           | 211 (40.7)      | 183 (32.2)      | 30 (16.5)       | 54 (19.9)       | 86 (27.7)       |
| 2                                           | 149 (28.8)      | 204 (35.9)      | 79 (43.4)       | 112 (41.3)      | 114 (36.8)      |
| 3                                           | 49 (9.5)        | 107 (18.8)      | 54 (29.7)       | 59 (21.8)       | 63 (20.3)       |
| 4                                           | 17 (3.3)        | 28 (4.9)        | 16 (8.8)        | 34 (12.5)       | 18 (5.8)        |
| BMI (kg/m <sup>2</sup> ) (mean (sd))        | 27.52 (5.46)    | 26.25 (5.37)    | 25.16 (5.45)    | 25.65 (5.36)    | 25.90 (5.48)    |
| Resting SaO <sub>2</sub> (mean (sd))        | 95.31 (2.13)    | 94.05 (3.23)    | 93.23 (3.43)    | 93.63 (3.59)    | 94.35 (2.79)    |
| Severe Exacerbations (No. (%))              | 62 (12.0)       | 136 (23.9)      | 73 (40.1)       | 271 (100.0)     | 132 (42.6)      |
| Exacerbation Frequency (No./yr) (mean (sd)) | 0.59 (0.89)     | 0.86 (1.05)     | 1.06 (1.04)     | 1.76 (0.82)     | 1.00 (0.00)     |
| PA:A Ratio (mean (sd))                      | 0.90 (0.14)     | 0.94 (0.16)     | 0.96 (0.15)     | 1.00 (0.16)     | 0.94 (0.15)     |
| Pi10 (mean (sd))                            | 4.40 (0.19)     | 4.42 (0.21)     | 4.40 (0.22)     | 4.40 (0.21)     | 4.41 (0.22)     |
| % WA (mean (sd))                            | 65.60 (4.09)    | 65.72 (4.09)    | 65.36 (3.90)    | 65.07 (4.23)    | 65.26 (4.28)    |
| % LAA (mean (sd))                           | 13.41 (9.83)    | 20.72 (11.69)   | 29.40 (12.76)   | 23.15 (12.93)   | 20.80 (13.37)   |
| Perc 15 (mean (sd))                         | -937.45 (48.45) | -964.79 (48.17) | -986.81 (33.93) | -971.96 (45.82) | -959.68 (49.13) |
| ILA (No. (%))                               | 55 (10.6)       | 60 (10.6)       | 5 (2.7)         | 25 (9.2)        | 31 (10.0)       |
| Subpleural ILA (No. (%))                    | 50 (9.7)        | 51 (9.0)        | 4 (2.2)         | 25 (9.2)        | 29 (9.4)        |
| Fibrotic ILA (No. (%))                      | 10 (1.9)        | 12 (2.1)        | 1 (0.5)         | 3 (1.1)         | 9 (2.9)         |
| Stroke (No. (%))                            | 21 (4.1)        | 17 (3.0)        | 5 (2.7)         | 10 (3.7)        | 11 (3.5)        |
| Hypertension (No. (%))                      | 221 (42.7)      | 207 (36.4)      | 57 (31.3)       | 86 (31.7)       | 114 (36.8)      |
| Diabetes (No. (%))                          | 59 (11.4)       | 43 (7.6)        | 22 (12.1)       | 22 (8.1)        | 22 (7.1)        |
| Chronic Bronchitis (No. (%))                | 163 (31.5)      | 201 (35.4)      | 72 (39.6)       | 95 (35.1)       | 98 (31.6)       |

**e-Table 11:** Characteristics of BODE group (score 0-2) compared to equally-sized MLMP-COPD mortality risk group.

|                                             | <i>BODE group</i>          | <i>MLMP-COPD group</i>     | <i>p-value</i> |
|---------------------------------------------|----------------------------|----------------------------|----------------|
| n                                           | 1726                       | 1726                       |                |
| Age in years (mean (sd))                    | 63.54 (8.63)               | 60.60 (8.25)               | <0.001         |
| Race (No. African American (%))             | 221 (12.8)                 | 252 (14.6)                 | 0.138          |
| Sex (No. female, (%))                       | 680 (39.4)                 | 751 (43.5)                 | 0.016          |
| Total Dead (No. (%))                        | 256 (14.8)                 | 199 (11.5)                 | 0.005          |
| Days Followed (median [IQR])                | 2499.00 [2158.25, 2864.00] | 2499.00 [2196.00, 2834.00] | 0.499          |
| BODE (median [IQR])                         | 1.00 [0.00, 2.00]          | 1.00 [0.00, 2.00]          | <0.001         |
| 6-minute walk distance (ft) (mean (sd))     | 1412.65 (308.15)           | 1451.04 (298.37)           | <0.001         |
| FEV1 % predicted (median [IQR])             | 64.40 [54.70, 71.50]       | 63.25 [52.40, 71.27]       | 0.018          |
| MMRC Dyspnea Score (No. (%))                |                            |                            | <0.001         |
| 0                                           | 650 (37.7)                 | 584 (33.8)                 |                |
| 1                                           | 627 (36.3)                 | 463 (26.8)                 |                |
| 2                                           | 331 (19.2)                 | 346 (20.0)                 |                |
| 3                                           | 118 (6.8)                  | 244 (14.1)                 |                |
| 4                                           | 0 (0.0)                    | 89 (5.2)                   |                |
| FEV1/FVC ratio (median [IQR])               | 0.56 [0.48, 0.63]          | 0.57 [0.49, 0.64]          | 0.085          |
| FEF25-75 in Liters (median [IQR])           | 0.67 [0.47, 0.93]          | 0.68 [0.47, 0.95]          | 0.342          |
| Resting SaO2 (median [IQR])                 | 96.00 [94.00, 97.00]       | 96.00 [95.00, 97.00]       | 0.002          |
| Exacerbation Frequency (No./yr) (mean (sd)) | 0.42 (0.86)                | 0.42 (0.87)                | 0.906          |
| Pack-years cigarette smoking (median [IQR]) | 44.50 [32.60, 60.58]       | 42.00 [30.92, 57.00]       | <0.001         |
| BMI (kg/m <sup>2</sup> ) (mean (sd))        | 27.97 (5.26)               | 28.43 (5.89)               | 0.014          |
| Severe Exacerbations (No. (%))              | 186 (10.8)                 | 141 (8.2)                  | 0.011          |



The logo for CHEST Online Supplement features a stylized icon of three curved lines in blue and orange on the left, followed by the word "CHEST" in a bold, black, sans-serif font with a trademark symbol, and "Online Supplement" in a blue, sans-serif font to the right.

|                                |                    |                    |        |
|--------------------------------|--------------------|--------------------|--------|
| PA:A Ratio (mean (sd))         | 0.88 (0.13)        | 0.87 (0.12)        | 0.006  |
| Pi10 (mean (sd))               | 3.89 (0.36)        | 3.85 (0.33)        | <0.001 |
| Diabetes (No. (%))             | 175 (10.1)         | 145 (8.4)          | 0.089  |
| % LAA < -950 HU (median [IQR]) | 6.30 [2.21, 14.66] | 5.35 [1.89, 13.60] | 0.012  |

**e-Table 12:** Characteristics of BODE group (score 3-4) compared to equally-sized MLMP-COPD mortality risk group.

|                                             | <i>BODE group</i>          | <i>MLMP-COPD group</i>     | <i>p-value</i> |
|---------------------------------------------|----------------------------|----------------------------|----------------|
| n                                           | 1166                       | 1166                       |                |
| Age in years (mean (sd))                    | 63.46 (8.28)               | 64.86 (7.87)               | <0.001         |
| Race (No. African American (%))             | 144 (12.3)                 | 131 (11.2)                 | 0.441          |
| Sex (No. female, (%))                       | 489 (41.9)                 | 463 (39.7)                 | 0.292          |
| Total Dead (No. (%))                        | 315 (27.0)                 | 308 (26.4)                 | 0.779          |
| Days Followed (median [IQR])                | 2318.00 [1704.50, 2768.25] | 2318.00 [1768.00, 2803.00] | 0.436          |
| BODE (median [IQR])                         | 3.00 [3.00, 4.00]          | 3.00 [2.00, 4.00]          | <0.001         |
| 6-minute walk distance (ft) (mean (sd))     | 1164.18 (325.39)           | 1150.99 (283.71)           | 0.297          |
| FEV1 % predicted (median [IQR])             | 45.70 [37.80, 55.30]       | 45.25 [37.00, 56.60]       | 0.686          |
| MMRC Dyspnea Score (No. (%))                |                            |                            | <0.001         |
| 0                                           | 53 (4.5)                   | 99 (8.5)                   |                |
| 1                                           | 144 (12.3)                 | 263 (22.6)                 |                |
| 2                                           | 433 (37.1)                 | 318 (27.3)                 |                |
| 3                                           | 410 (35.2)                 | 341 (29.2)                 |                |
| 4                                           | 126 (10.8)                 | 145 (12.4)                 |                |
| FEV1/FVC ratio (median [IQR])               | 0.46 [0.38, 0.55]          | 0.45 [0.38, 0.54]          | 0.170          |
| FEF25-75 in Liters (median [IQR])           | 0.40 [0.30, 0.58]          | 0.40 [0.29, 0.56]          | 0.345          |
| Resting SaO2 (median [IQR])                 | 95.00 [93.00, 97.00]       | 95.00 [93.00, 96.00]       | 0.545          |
| Exacerbation Frequency (No./yr) (mean (sd)) | 0.84 (1.16)                | 0.83 (1.19)                | 0.874          |
| Pack-years cigarette smoking (median [IQR]) | 47.05 [36.00, 66.00]       | 48.00 [38.00, 67.95]       | 0.111          |
| BMI (kg/m <sup>2</sup> ) (mean (sd))        | 28.14 (6.26)               | 27.63 (5.93)               | 0.042          |

The logo for CHEST Online Supplement features a stylized icon of three curved lines in blue and orange to the left of the text "CHEST™ Online Supplement". "CHEST" is in a large, bold, black sans-serif font, and "Online Supplement" is in a smaller, blue sans-serif font.

|                                |                     |                     |       |
|--------------------------------|---------------------|---------------------|-------|
| Severe Exacerbations (No. (%)) | 269 (23.1)          | 270 (23.2)          | 1.000 |
| PA:A Ratio (mean (sd))         | 0.91 (0.14)         | 0.91 (0.14)         | 0.419 |
| Pi10 (mean (sd))               | 3.97 (0.37)         | 4.00 (0.37)         | 0.113 |
| Diabetes (No. (%))             | 160 (13.7)          | 143 (12.3)          | 0.324 |
| % LAA < -950 HU (median [IQR]) | 13.15 [5.02, 23.75] | 14.71 [6.36, 23.98] | 0.021 |

**e-Table 13:** Characteristics of BODE group (score 5-6) compared to equally-sized MLMP-COPD mortality risk group.

|                                             | <i>BODE group</i>          | <i>MLMP-COPD group</i>     | <i>p-value</i> |
|---------------------------------------------|----------------------------|----------------------------|----------------|
| n                                           | 824                        | 824                        |                |
| Age in years (mean (sd))                    | 63.66 (8.05)               | 66.49 (7.25)               | <0.001         |
| Race (No. African American (%))             | 102 (12.4)                 | 86 (10.4)                  | 0.245          |
| Sex (No. female, (%))                       | 332 (40.3)                 | 312 (37.9)                 | 0.337          |
| Total Dead (No. (%))                        | 347 (42.1)                 | 388 (47.1)                 | 0.047          |
| Days Followed (median [IQR])                | 2134.00 [1159.50, 2649.00] | 2040.00 [1105.00, 2673.25] | 0.162          |
| BODE (median [IQR])                         | 5.00 [5.00, 6.00]          | 5.00 [4.00, 6.00]          | <0.001         |
| 6-minute walk distance (ft) (mean (sd))     | 941.64 (330.47)            | 883.23 (302.87)            | <0.001         |
| FEV1 % predicted (median [IQR])             | 31.60 [24.80, 38.70]       | 32.70 [25.37, 42.40]       | 0.004          |
| MMRC Dyspnea Score (No. (%))                |                            |                            | <0.001         |
| 0                                           | 0 (0.0)                    | 20 (2.4)                   |                |
| 1                                           | 20 (2.4)                   | 60 (7.3)                   |                |
| 2                                           | 130 (15.8)                 | 217 (26.3)                 |                |
| 3                                           | 383 (46.5)                 | 320 (38.8)                 |                |
| 4                                           | 291 (35.3)                 | 207 (25.1)                 |                |
| FEV1/FVC ratio (median [IQR])               | 0.36 [0.30, 0.43]          | 0.36 [0.30, 0.43]          | 0.879          |
| FEF25-75 in Liters (median [IQR])           | 0.27 [0.20, 0.36]          | 0.27 [0.21, 0.36]          | 0.582          |
| Resting SaO2 (median [IQR])                 | 94.00 [92.00, 96.00]       | 94.00 [92.00, 96.00]       | 0.068          |
| Exacerbation Frequency (No./yr) (mean (sd)) | 1.16 (1.44)                | 1.12 (1.30)                | 0.554          |
| Pack-years cigarette smoking (median [IQR]) | 50.00 [38.00, 70.50]       | 50.30 [39.00, 72.00]       | 0.302          |
| BMI (kg/m <sup>2</sup> ) (mean (sd))        | 26.84 (6.40)               | 26.22 (5.82)               | 0.040          |
| Severe Exacerbations (No. (%))              | 280 (34.0)                 | 315 (38.2)                 | 0.081          |

|                                |                      |                      |        |
|--------------------------------|----------------------|----------------------|--------|
| PA:A Ratio (mean (sd))         | 0.93 (0.15)          | 0.95 (0.15)          | 0.005  |
| Pi10 (mean (sd))               | 3.97 (0.35)          | 4.03 (0.37)          | <0.001 |
| Diabetes (No. (%))             | 79 (9.6)             | 108 (13.1)           | 0.030  |
| % LAA < -950 HU (median [IQR]) | 21.74 [11.38, 33.19] | 22.03 [12.92, 32.49] | 0.591  |

## References

1. Regan EA, Hokanson JE, Murphy JR, et al. Genetic Epidemiology of COPD (COPDGene) Study Design. *COPD J Chronic Obstr Pulm Dis*. 2011;7(1):32-43. doi:10.3109/15412550903499522
2. Vestbo J, Anderson W, Coxson HO, et al. Evaluation of COPD Longitudinally to Identify Predictive Surrogate End-points (ECLIPSE). *Eur Respir J*. 2008;31(4):869-873. doi:10.1183/09031936.00111707
3. Celli BR, Locantore N, Yates J, et al. Inflammatory biomarkers improve clinical prediction of mortality in chronic obstructive pulmonary disease. *Am J Respir Crit Care Med*. 2012;185(10):1065-1072. doi:10.1164/rccm.201110-1792OC
4. Breiman LEO. Random Forests. *Mach Learn*. 2001;45:5-32.
5. Ishwaran H, Kogalur UB, Blackstone EH, Lauer MS. Random survival forests. *Ann Appl Stat*. 2008;2(3):841-860. doi:10.1214/08-AOAS169
6. Datema FR, Moya A, Krause P, et al. Novel head and neck cancer survival analysis approach: random survival forests versus Cox proportional hazards regression. *Head Neck*. 2012;34(1):50-58. doi:10.1002/hed.21698
7. Gromping U. Variable Importance Assessment in Regression: Linear Regression versus Random Forest. *Am Stat*. 2009;63(4):308-319. doi:10.1198/tast.2009.08199
8. Venables, W.N. and Ripley BD. *Modern Applied Statistics with S*. Fourth. New York: Springer; 2002.
9. Company I-HSC. My.stepwise R package. 2017. <https://github.com/cran/My.stepwise>.
10. Friedman J, Hastie T TR. Regularization Paths for Generalized Linear Models via Coordinate Descent. *J Stat Softw*. 2010;33(1):1-22.
11. Simon N, Friedman J, Hastie T TR. Regularization Paths for Cox's Proportional Hazards Model via Coordinate Descent. *J Stat Softw*. 2011;39(5):1-13.
12. Mogensen UB, Ishwaran H, Gerds TA. Evaluating Random Forests for Survival Analysis using Prediction Error Curves. *J Stat Softw*. 2012;50(11):1-23. doi:10.18637/jss.v050.i11
13. Demler O V, Paynter NP, Cook NR. Tests of calibration and goodness-of-fit in the survival setting. *Stat Med*. 2015;34(10):1659-1680. doi:10.1002/sim.6428
14. Yuan Tang, Masaaki Horikoshi and WL. ggfortify: Unified Interface to Visualize Statistical Result of Popular R Packages. *R J*. 2016;8(2):478-489.
